# Supplementary material for: Defining Time in Acute Upper Gastrointestinal Bleeding: When Should We Start the Clock?
Source: MDPI journal article supplement (doi:10.3390/jcm12072542), 2023-03-28
Supplement: s1 [file s1]

## Supplementary files

**Table S1.** Demographics and clinical features of overall patients in “presentation-to-endoscopy” group by time frame

|                                    | 0/6h           | 6/12h          | 12/24h         | ≥24          | p-value |
|------------------------------------|----------------|----------------|----------------|--------------|---------|
|                                    | N=2072         | N=520          | N=399          | N=175        |         |
| Age, mean [± SD]                   | 67.1 [±15.8]   | 70.2 [±14.9]   | 70 [±16.1]     | 70.4 [±15.8] | <0.001  |
| Male gender, n(%)                  | 1429 (69)      | 348 (66.9)     | 269 (67.4)     | 107 (61.1)   |         |
| ASA score, n(%)                    |                |                |                |              | 0.29    |
| I                                  | 550 (26.5)     | 123 (23.7)     | 114 (28.6)     | 55 (31.4)    |         |
| III                                | 674 (32.5)     | 175 (33.7)     | 120 (30.1)     | 60 (34.3)    |         |
| II                                 | 729 (35.2)     | 189 (36.3)     | 133 (33.3)     | 49 (28)      |         |
| IV                                 | 119 (5.7)      | 33 (6.3)       | 32 (8)         | 11 (6.3)     |         |
| Syncope, yes, n (%)                | 219 (10.6)     | 61 (11.7)      | 30 (7.5)       | 17 (9.7)     | 0.19    |
| Hematemesis, yes, n (%)            | 1049 (50.6)    | 179 (34.4)     | 101 (25.3)     | 54 (30.9)    | <0.001  |
| Melena, yes, n (%)                 | 1312 (63.3)    | 352 (67.7)     | 294 (73.7)     | 117 (66.9)   | <0.001  |
| Hematemesis and melena, yes, n (%) | 385 (18.6)     | 57 (11)        | 34 (8.5)       | 17 (9.7)     | <0.001  |
| Shock, yes, n (%)                  | 174 (8.4)      | 22 (4.2)       | 16 (4)         | 14 (8)       | <0.001  |
| Rockall score, median (IQR)        | 4 (3-5)        | 4 (3-5)        | 3.5 (2-5)      | 4 (3-5)      | 0.41    |
| GB score, median (IQR)             | 7 (5-9)        | 8 (5-9)        | 7 (5-9)        | 8 (6-9)      | 0.80    |
| ABC score, median (IQR)            | 5 (3-6)        | 5 (3-6)        | 5 (3-6)        | 4.5 (3-6)    | 0.74    |
| AIMS65 score, median (IQR)         | 1 (1-2)        | 1 (1-2)        | 2 (1-2)        | 2 (1-2)      | 0.55    |
| PNED score, median (IQR)           | 4 (2-6)        | 3 (1-5)        | 3 (1-5)        | 3 (1-5)      | <0.001  |
| Hemoglobin level, gr/d             | 9.1 (7.5-10.8) | 8.9 (7.5-10.8) | 8.5 (7.2-10.8) | 8.5 (6.8-10) | 0.006   |
| Bleeding source                    |                |                |                |              | <0.001  |
| Non-variceal, n (%)                | 1632 (78.8)    | 470 (90.4)     | 361 (90.5)     | 169 (96.6)   |         |
| Variceal, n(%)                     | 440 (21.2)     | 50 (9.6)       | 38 (9.5)       | 6 (3.4)      |         |

**Table S2.** Major outcomes of population in “presentation to endoscopy” group

|                                                   | <b>0/6h</b> | <b>6/12h</b> | <b>12/24h</b> | <b>≥24h</b> | <b>p-value</b> |
|---------------------------------------------------|-------------|--------------|---------------|-------------|----------------|
|                                                   | N=2072      | N=520        | N=399         | N=175       |                |
| <b>Transfusion, yes (%)</b>                       | 1211 (58.4) | 302 (58.1)   | 258 (64.7)    | 114 (65.1)  | 0.044          |
| <b>Rebleeding, yes (%)</b>                        | 131 (6.3)   | 26 (5)       | 22 (5.5)      | 13 (7.4)    | 0.56           |
| <b>Need for interventional radiology, yes (%)</b> | 21 (1)      | 2 (0.4)      | 6 (1.5)       | 1 (0.6)     | 0.33           |
| <b>Need for surgery, yes (%)</b>                  | 64 (3.1)    | 13 (2.5)     | 17 (4.3)      | 8 (4.6)     | 0.34           |
| <b>Mortality, yes (%)</b>                         | 146 (7)     | 28 (5.4)     | 24 (6)        | 11 (6.3)    | 0.54           |

**Table S3.** Demographics and clinical features of overall patients in “symptoms-to-endoscopy” group by time frame

|                                           | 0/6h         | 6/12h          | 12/24h       | ≥24h           | <i>p</i> -value |
|-------------------------------------------|--------------|----------------|--------------|----------------|-----------------|
|                                           | N=1304       | N=745          | N=578        | N=539          |                 |
| <b>Age, mean [± SD]</b>                   | 68.1 [±15.1] | 68.3 [±15.6]   | 68.4 [±16.4] | 67.9 [±16.7]   | 0.97            |
| <b>Male gender, n(%)</b>                  | 871 (66.8)   | 497 (66.7)     | 404 (69.9)   | 381 (70.7)     | 0.24            |
| <b>ASA score, n(%)</b>                    |              |                |              |                | <0.001          |
| I                                         | 297 (22.8)   | 185 (24.8)     | 172 (29.8)   | 188 (34.9)     |                 |
| III                                       | 461 (35.4)   | 250 (33.6)     | 165 (28.5)   | 153 (28.4)     |                 |
| II                                        | 455 (34.9)   | 276 (37)       | 203 (35.1)   | 166 (30.8)     |                 |
| IV                                        | 91 (7)       | 34 (4.6)       | 38 (6.6)     | 32 (5.9)       |                 |
| <b>Syncope, yes, n (%)</b>                | 140 (10.7)   | 84 (11.3)      | 57 (9.9)     | 46 (8.5)       | 0.40            |
| <b>Hematemesis, yes, n (%)</b>            | 765 (58.7)   | 287 (38.5)     | 195 (33.7)   | 136 (25.2)     | <0.001          |
| <b>Melena, yes, n (%)</b>                 | 717 (55)     | 504 (67.7)     | 430 (74.4)   | 424 (78.7)     | <0.001          |
| <b>Hematemesis and melena, yes, n (%)</b> | 240 (18.4)   | 104 (14)       | 84 (14.5)    | 65 (12.1)      | <0.001          |
| <b>Shock, yes, n (%)</b>                  | 118 (9)      | 40 (5.4)       | 31 (5.4)     | 37 (6.9)       | 0.003           |
| <b>Rockall score, median (IQR)</b>        | 4 (3-5)      | 4 (2-5)        | 3 (2-5)      | 3.5 (2-5)      | <0.001          |
| <b>GB score, median (IQR)</b>             | 8 (5-9)      | 7 (4-9)        | 7 (5-9)      | 7 (6-9)        | 0.047           |
| <b>ABC score, median (IQR)</b>            | 5 (3-7)      | 4 (3-6)        | 4 (3-6)      | 4 (3-6)        | <0.001          |
| <b>AIMS65 score, median (IQR)</b>         | 2 (1-2)      | 1 (1-2)        | 1 (1-2)      | 1 (1-2)        | <0.001          |
| <b>PNED score, median (IQR)</b>           | 4 (2-6)      | 3 (1-5)        | 3 (1-5)      | 3 (1-5)        | <0.001          |
| <b>Hemoglobin level, gr/d</b>             | 9 (7.5-10.7) | 9.3 (7.7-11.1) | 8.8 (7.4-11) | 8.5 (6.8-10.4) | <0.001          |
| <b>Bleeding source</b>                    |              |                |              |                | <0.001          |
| <b>Non-variceal, n (%)</b>                | 971 (74.5)   | 647 (86.8)     | 508 (87.9)   | 506 (93.9)     |                 |
| <b>Variceal, n(%)</b>                     | 333 (25.5)   | 98 (13.2)      | 70 (12.1)    | 33 (6.1)       |                 |

**Table S4.** Clinical outcomes in the “symptoms-to-endoscopy” groups by time frame

|                                                   | <b>0/6h</b> | <b>6/12h</b> | <b>12/24h</b> | <b>≥24h</b> | <b>p-value</b> |
|---------------------------------------------------|-------------|--------------|---------------|-------------|----------------|
|                                                   | N=1304      | N=745        | N=578         | N=539       |                |
| <b>Transfusion, yes (%)</b>                       | 804 (61.7)  | 396 (53.2)   | 348 (60.2)    | 337 (62.5)  | <0.001         |
| <b>Rebleeding, yes (%)</b>                        | 106 (8.1)   | 35 (4.7)     | 27 (4.7)      | 24 (4.5)    | <0.001         |
| <b>Need for interventional radiology, yes (%)</b> | 20 (1.5)    | 6 (0.8)      | 3 (0.5)       | 1 (0.2)     | 0.024          |
| <b>Need for surgery, yes (%)</b>                  | 45 (3.5)    | 21 (2.8)     | 20 (3.5)      | 16 (3)      | 0.84           |
| <b>Mortality, yes (%)</b>                         | 117 (9)     | 38 (5.1)     | 31 (5.4)      | 23 (4.3)    | <0.001         |

**Table S5.** Demographics and clinical features in the outpatients according to “presentation-to-endoscopy” group by time frame

|                                           | <b>0/6h</b>    | <b>6/12h</b>   | <b>12/24h</b>  | <b>≥24h</b>    | <b>p-value</b> |
|-------------------------------------------|----------------|----------------|----------------|----------------|----------------|
|                                           | N=1730         | N=378          | N=319          | N=124          |                |
| <b>Age, mean [± SD]</b>                   | 66.4 [±15.9]   | 69.7 [±14.9]   | 69.7 [±16.8]   | 69 [±16.6]     | <0.001         |
| <b>Male gender, n(%)</b>                  | 1207 (69.8)    | 259 (68.5)     | 220 (69)       | 76 (61.3)      | 0.27           |
| <b>ASA score, n(%)</b>                    |                |                |                |                | 0.55           |
| I                                         | 495 (28.6)     | 101 (26.7)     | 98 (30.7)      | 46 (37.1)      |                |
| III                                       | 537 (31)       | 117 (31)       | 87 (27.3)      | 37 (29.8)      |                |
| II                                        | 617 (35.7)     | 140 (37)       | 116 (36.4)     | 36 (29)        |                |
| IV                                        | 81 (4.7)       | 20 (5.3)       | 18 (5.6)       | 5 (4)          |                |
| <b>Syncope, yes, n (%)</b>                | 195 (11.3)     | 55 (14.6)      | 26 (8.2)       | 14 (11.3)      | 0.07           |
| <b>Hematemesis, yes, n (%)</b>            | 903 (52.2)     | 147 (38.9)     | 80 (25.1)      | 43 (34.7)      | <0.001         |
| <b>Melena, yes, n (%)</b>                 | 1100 (63.6)    | 248 (65.6)     | 239 (74.9)     | 79 (63.7)      | <0.001         |
| <b>Hematemesis and melena, yes, n (%)</b> | 342 (19.8)     | 48 (12.7)      | 31 (9.7)       | 14 (11.3)      | <0.001         |
| <b>Shock, yes, n (%)</b>                  | 147 (8.5)      | 16 (4.2)       | 8 (2.5)        | 9 (7.3)        | 0.001          |
| <b>Rockall score, median (IQR)</b>        | 4 (3-5)        | 4 (2-5)        | 3 (2-5)        | 4 (2-5)        | 0.27           |
| <b>GB score, median (IQR)</b>             | 7 (5 -9)       | 8 (5 -9)       | 7 (5 -9)       | 8 (4 -9)       | 0.87           |
| <b>ABC score, median (IQR)</b>            | 4 (3 -6)       | 4 (3 -6)       | 4 (3 -6)       | 4 (3 -5)       | 0.22           |
| <b>AIMS65 score, median (IQR)</b>         | 1 (1 -2)       | 1 (1 -2)       | 1 (1 -2)       | 1.5 (1 -2)     | 0.47           |
| <b>PNED score, median (IQR)</b>           | 4 (1 -6)       | 3 (1 -4)       | 3 (1 -5)       | 3 (1 -4.5)     | <0.001         |
| <b>Hemoglobin level, gr/d</b>             | 9.2 (7.5-10.9) | 8.8 (7.5-10.8) | 8.6 (7.2-10.8) | 8.6 (6.6-10.4) | 0.021          |
| <b>Bleeding source</b>                    |                |                |                |                | <0.001         |
| <b>Non-variceal, n (%)</b>                | 1333 (77.1)    | 335 (88.6)     | 293 (91.8)     | 119 (96)       |                |
| <b>Variceal, n(%)</b>                     | 397 (22.9)     | 43 (11.4)      | 26 (8.2)       | 5 (4)          |                |

**Table S6.** Outcomes in in the outpatients according to “presentation to endoscopy” group by time frame

|                                                   | <b>0/6h</b> | <b>6/12h</b> | <b>12/24h</b> | <b>≥24h</b> | <b>p-value</b> |
|---------------------------------------------------|-------------|--------------|---------------|-------------|----------------|
|                                                   | N=1730      | N=378        | N=319         | N=124       |                |
| <b>Transfusion, yes (%)</b>                       | 1002 (57.9) | 224 (59.3)   | 203 (63.6)    | 72 (58.1)   | 0.30           |
| <b>Rebleeding, yes (%)</b>                        | 98 (5.7)    | 17 (4.5)     | 14 (4.4)      | 5 (4)       | 0.60           |
| <b>Need for interventional radiology, yes (%)</b> | 14 (0.8)    | 2 (0.5)      | 2 (0.6)       | 1 (0.8)     | 0.94           |
| <b>Need for surgery, yes (%)</b>                  | 48 (2.8)    | 11 (2.9)     | 14 (4.4)      | 7 (5.6)     | 0.17           |
| <b>Mortality, yes (%)</b>                         | 97 (5.6)    | 19 (5)       | 11 (3.4)      | 3 (2.4)     | 0.21           |

**Table S7.** Demographics and clinical features of outpatients in the “symptoms-to-endoscopy” group

|                                           | <b>0/6h</b>    | <b>6/12h</b>   | <b>12/24h</b> | <b>≥24h</b>    | <b>p-value</b> |
|-------------------------------------------|----------------|----------------|---------------|----------------|----------------|
|                                           | N=987          | N=594          | N=505         | N=465          | 2              |
| <b>Age, mean [± SD]</b>                   | 67.2 [±15.2]   | 67.4 [±15.7]   | 68 [±16.9]    | 67.3 [±16.7]   | 0.82           |
| <b>Male gender, n(%)</b>                  | 670 (67.9)     | 403 (67.8)     | 355 (70.3)    | 334 (71.8)     | 0.38           |
| <b>ASA score, n(%)</b>                    |                |                |               |                | 0.005          |
| I                                         | 248 (25.1)     | 169 (28.5)     | 154 (30.5)    | 169 (36.3)     |                |
| III                                       | 317 (32.1)     | 192 (32.3)     | 139 (27.5)    | 130 (28)       |                |
| II                                        | 368 (37.3)     | 209 (35.2)     | 185 (36.6)    | 147 (31.6)     |                |
| IV                                        | 54 (5.5)       | 24 (4)         | 27 (5.3)      | 19 (4.1)       |                |
| <b>Syncope, yes, n (%)</b>                | 119 (12.1)     | 75 (12.6)      | 52 (10.3)     | 44 (9.5)       | 0.30           |
| <b>Hematemesis, yes, n (%)</b>            | 624 (63.2)     | 258 (43.4)     | 175 (34.7)    | 116 (24.9)     | <0.001         |
| <b>Melena, yes, n (%)</b>                 | 538 (54.5)     | 386 (65)       | 373 (73.9)    | 369 (79.4)     | <0.001         |
| <b>Hematemesis and melena, yes, n (%)</b> | 208 (21.1)     | 92 (15.5)      | 76 (15)       | 59 (12.7)      | <0.001         |
| <b>Shock, yes, n (%)</b>                  | 94 (9.5)       | 34 (5.7)       | 25 (5)        | 27 (5.8)       | 0.001          |
| <b>Rockall score, median (IQR)</b>        | 4 (3-5)        | 4 (2-5)        | 3 (2-5)       | 3 (2-5)        | <0.001         |
| <b>GB score, median (IQR)</b>             | 8 (5-9)        | 7 (4-9)        | 7 (4-9)       | 7 (6-9)        | 0.026          |
| <b>ABC score, median (IQR)</b>            | 5 (3-6)        | 4 (3-6)        | 4 (3-6)       | 4 (3-5)        | <0.001         |
| <b>AIMS65 score, median (IQR)</b>         | 2 (1-2)        | 1 (1-2)        | 1 (1-2)       | 1 (1-2)        | <0.001         |
| <b>PNED score, median (IQR)</b>           | 4 (2-6)        | 3 (1-5)        | 3 (1-5)       | 2 (0-4)        | <0.001         |
| <b>Hemoglobin level, gr/d</b>             | 9.1 (7.5-10.7) | 9.5 (7.8-11.2) | 8.9 (7.4-11)  | 8.5 (6.8-10.5) | <0.001         |
| <b>Bleeding source</b>                    |                |                |               |                | <0.001         |
| <b>Non-variceal, n (%)</b>                | 701 (71)       | 502 (84.5)     | 439 (86.9)    | 438 (94.2)     |                |
| <b>Variceal, n(%)</b>                     | 286 (29)       | 92 (15.5)      | 66 (13.1)     | 27 (5.8)       |                |

**Table S8.** Outcomes in in the outpatients according to “symptoms-to-endoscopy” group

|                                                   | <b>0/6h</b> | <b>6/12h</b> | <b>12/24h</b> | <b>≥24h</b> | <b>p-value</b> |
|---------------------------------------------------|-------------|--------------|---------------|-------------|----------------|
|                                                   | N=987       | N=594        | N=505         | N=465       |                |
| <b>Transfusion, yes (%)</b>                       | 607 (61.5)  | 311 (52.4)   | 301 (59.6)    | 282 (60.6)  | 0.003          |
| <b>Rebleeding, yes (%)</b>                        | 68 (6.9)    | 29 (4.9)     | 19 (3.8)      | 18 (3.9)    | 0.023          |
| <b>Need for interventional radiology, yes (%)</b> | 11 (1.1)    | 6 (1)        | 2 (0.4)       | 0           | 0.082          |
| <b>Need for surgery, yes (%)</b>                  | 33 (3.3)    | 17 (2.9)     | 16 (3.2)      | 14 (3)      | 0.96           |
| <b>Mortality, yes (%)</b>                         | 70 (7.1)    | 29 (4.9)     | 18 (3.6)      | 13 (2.8)    | 0.001          |

**Table S9.** Concordance between the two time frames in the outpatient’s cohort (expressed as number of patients)

| Symptoms onset to endoscopy group | Presentation to endoscopy group |                  |                   |                 |              |
|-----------------------------------|---------------------------------|------------------|-------------------|-----------------|--------------|
|                                   | <b>0-6hours</b>                 | <b>6-12hours</b> | <b>12-24hours</b> | <b>≥24hours</b> | <b>Total</b> |
| <b>0-6hours</b>                   | 1028                            | 13               | 4                 | 5               | 1.050        |
| <b>6-12hours</b>                  | 381                             | 213              | 20                | 4               | 618          |
| <b>12-24hours</b>                 | 191                             | 128              | 198               | 8               | 525          |
| <b>&gt;24hours</b>                | 220                             | 41               | 107               | 111             | 479          |
| <b>Total</b>                      | 1820                            | 395              | 329               | 128             | 2672         |

Agreement= **77.4%**; Kappa = **0.41** SE= **0.01**

Expected agreement= **62%**; Z = **33.8**, Prob =**0.0000**

**Table S10.** Concordance between the two time frames in the inpatient’s cohort (expressed as number of patients)

| Symptoms onset to endoscopy group | Presentation to endoscopy group |                  |                   |                 |              |
|-----------------------------------|---------------------------------|------------------|-------------------|-----------------|--------------|
|                                   | <b>0-6hours</b>                 | <b>6-12hours</b> | <b>12-24hours</b> | <b>≥24hours</b> | <b>Total</b> |
| <b>0-6hours</b>                   | 201                             | 9                | 24                | 20              | 254          |
| <b>6-12hours</b>                  | 24                              | 94               | 6                 | 3               | 127          |
| <b>12-24hours</b>                 | 4                               | 17               | 27                | 5               | 53           |
| <b>&gt;24hours</b>                | 23                              | 5                | 13                | 19              | 60           |
| <b>Total</b>                      | 252                             | 125              | 70                | 47              | 494          |

Agreement = **81.4%**; Kappa=**0.47** SE=**0.03**

Expected agreement= **64%**; Z=**14**, Prob =**0.0000**



**Table S11.** Effect of “presentation-to-endoscopy” timing on mortality in outpatients

|                    | <b>Odds Ratio</b> | <b>S. E.</b> | <b>z</b> | <b>P&gt; z </b> | <b>[95% C.I.]</b> |
|--------------------|-------------------|--------------|----------|-----------------|-------------------|
| <b>0-6hours</b>    |                   |              |          |                 |                   |
| <b>6-12hours</b>   | 0.83              | 0.21         | -0.71    | 0.477           | 0.50-1.38         |
| <b>12-24hours</b>  | 0.68              | 0.20         | -1.29    | 0.197           | 0.38-1.22         |
| <b>&gt;24hours</b> | 0.40              | 0.23         | -1.56    | 0.118           | 0.12-1.27         |
| <b>_cons</b>       | 0.06              | 0.01         | -27.76   | 0.000           | 0.05-0.07         |

**Table S12.** Effect of “symptoms to endoscopy” timing on mortality in outpatients

|                    | <b>Odds Ratio</b> | <b>S. E.</b> | <b>z</b> | <b>P&gt; z </b> | <b>[95% C.I.]</b> |
|--------------------|-------------------|--------------|----------|-----------------|-------------------|
| <b>0-6hours</b>    |                   |              |          |                 |                   |
| <b>6-12hours</b>   | 0.69              | 0.15         | -1.71    | 0.087           | 0.45- 1.06        |
| <b>12-24hours</b>  | 0.51              | 0.13         | -2.58    | 0.010           | 0.31-0.85         |
| <b>&gt;24hours</b> | 0.36              | 0.11         | -3.32    | 0.001           | 0.20-0.66         |
| <b>_cons</b>       | 0.08              | 0.01         | -21.41   | 0.000           | 0.06-0.10         |
